1 **Lifetime changes in CD4 count, viral load suppression and adherence among**  
2 **adolescents living with HIV in urban Peru**

3  
4 Carly A Rodriguez, MPH<sup>1</sup>, Lenka Kolevic, MD<sup>2</sup>, Alicia Ramos<sup>3</sup>, Milagros Wong<sup>3</sup>, Maribel  
5 Munoz<sup>3</sup>, Kunjal Patel, ScD<sup>4</sup>, Molly F Franke, ScD<sup>1</sup> §

6  
7 1 Department of Global Health and Social Medicine, Harvard Medical School, Boston, MA, USA

8 2 Infectious Disease, Instituto Nacional de Salud del Niño, Lima, Peru

9 3 Socios En Salud Sucursal Peru, Lima, Peru

10 4 Department of Epidemiology, Harvard TH Chan School of Public Health, Boston, MA

11

12

13

14

15 § **Corresponding author:** Molly F. Franke

16

17 Department of Global Health and Social Medicine

18 Harvard Medical School

19 641 Huntington Avenue

20 Boston, MA 02115

21 Email: [molly\\_franke@hms.harvard.edu](mailto:molly_franke@hms.harvard.edu)

22 Phone: 617-432-5224

23

24

25 **Keywords:** Peru; adolescent health; HIV; adherence; viral load suppression; youth

26

27 **ABSTRACT**

28 Introduction

29 Viral load suppression and adherence to combined antiretroviral therapy (cART) have been  
30 shown to be lower in adolescents than in other age groups; however, this relationship has not  
31 been documented longitudinally from childhood to adolescence and has rarely been examined  
32 outside of high-resource settings and sub-Saharan Africa. To address this knowledge gap, we  
33 quantified longitudinal changes in CD4 cell count, viral load suppression, and cART adherence  
34 in adolescents living with HIV in urban, Peru.

35

36 Methods

37 We conducted a retrospective chart review among adolescents ages 10-18 years on cART and  
38 receiving care at a large, public sector pediatric hospital as of December 2015. We abstracted  
39 clinical notes indicating nonadherence and viral load and CD4 counts from childhood to  
40 adolescence. We modeled the association between age and each outcome with restricted cubic  
41 splines accounting for multiple observations per person, and graphed study outcomes by age.

42

43 Results

44 A median of 7.7 years (25<sup>th</sup> percentile=4.9, 75<sup>th</sup> percentile=10.2) of follow up were observed for  
45 128 adolescents. Nearly 70% of patients had at least one nonadherence note and the  
46 proportion with nonadherence increased log-linearly with age ( $p < 0.0001$ ). The peak proportion  
47 with viral load suppression was 84% (95% CI: 79, 88) at age 13, which dropped to 67% (95%  
48 CI: 47, 83) by age 18. Mean CD4 count decreased at age 13, dropping from 723 cells/mm<sup>3</sup>  
49 (95% CI: 666, 784) to 429 cells/mm<sup>3</sup> (95% CI: 356, 517) by age 18.

50

51 Conclusion

52 This is the first report from Latin America to examine longitudinal changes in HIV outcomes from  
53 childhood into adolescence. Consistent with the limited evidence from other settings, decreases  
54 in viral load suppression and mean CD4 count occurred in early adolescence in tandem with  
55 increases in nonadherence. Adolescent-friendly cART adherence support interventions to target  
56 this critical period are urgently needed.

57

58

## 59 **Introduction**

60 Combined antiretroviral therapy (cART) has greatly improved survival for infants and children  
61 perinatally infected with HIV. As a result, adolescents make up a growing portion of the global  
62 HIV burden with an estimated 1.8 million adolescents living with HIV (ALHIV) between ages 10  
63 and 19 years in 2017.[1] Lower viral load suppression rates have been observed in children and  
64 adolescents under 15 years than in adults[2] and uptake and adherence to cART is reported to  
65 be lower in adolescents than other age groups.[3–6] Furthermore, HIV-related deaths among  
66 adolescents have tripled over the last two decades, occurring primarily in those perinatally  
67 infected.[7]

68 Little is known about longitudinal changes in HIV outcomes across the lifespan, particularly  
69 during childhood and adolescence—a period of dramatic physical growth and cognitive  
70 development. Available studies on the long-term outcomes of perinatally infected adolescents  
71 have short follow-up periods and are largely from high resource settings or Sub Saharan Africa,  
72 [8–11] with limited data from cohorts in Latin America.[12,13] The objective of this study was to  
73 examine changes in absolute CD4 count, viral load suppression, and adherence from childhood  
74 to adolescence among patients on cART in Lima, Peru.

75

## 76 **Methods**

### 77 **Study design**

78 We conducted a retrospective chart review of ALHIV ages 10 to 18 years receiving care at the  
79 Instituto Nacional de Salud del Niño (National Institute for Child Health, henceforth INSN) in  
80 Lima, Peru. INSN is a national public sector referral hospital for pediatric care and hosts the  
81 largest HIV treatment clinic for children and adolescents in the country. In 2004, cART became  
82 widely available in Peru due to the expansion of free, universal access to HIV care and  
83 treatment.[14] The earliest guidance for treatment of HIV in children and adolescents in 2003

84 recommended two nucleoside reverse transcriptase inhibitors (NRTIs) (zidovudine and  
85 lamivudine) and one protease inhibitor (nelfinavir).[15] This guidance was updated in 2013 to  
86 recommend two NRTIs and one non-nucleoside reverse transcriptase inhibitor (nevirapine or  
87 efaviranez).[16] Between June 2015 and April 2016, trained study personnel abstracted  
88 demographic data and cART treatment history, including longitudinal CD4 measures, viral load  
89 counts, and clinical notes describing nonadherence after cART initiation from paper clinical  
90 charts for 132 adolescents. All adolescents were alive and on cART at the time of the chart  
91 review.

92

### 93 **Study outcomes**

94 Absolute CD4<sup>+</sup> lymphocyte monitoring was conducted every three months and viral load  
95 monitoring was conducted every six months per national guidelines.[15,16] CD4 count and viral  
96 load and measurements <6 months after cART initiation were excluded to allow values to  
97 stabilize post-treatment initiation. This led to the exclusion of four adolescents from the analysis  
98 who were on cART for <6 months at the time of the chart review. CD4 counts were additionally  
99 restricted to ages 5 to 18 years because of the tendency for CD4 counts to be higher at young  
100 ages due to age-related immune development.[17] Adherence and viral load were restricted to  
101 the same age-years for comparability. Due to varying viral load lower limits of detection over the  
102 follow-up period, we defined viral load suppression as <400 copies/ml, the least sensitive  
103 threshold. Providers routinely assessed nonadherence using clinical judgement during medical  
104 encounters; therefore, the absence of clinician-documented nonadherence at a given encounter  
105 was presumed to indicate adequate adherence at that time.

106

## 107 **Statistical analysis**

108 We conducted longitudinal analyses of the three study outcomes using generalized estimating  
109 equations and graphed the mean CD4 count and predicted probabilities of viral load  
110 suppression and nonadherence by age-month.

111 In generalized estimating equations for CD4 count we used a normal response and log link; for  
112 viral load suppression and nonadherence we used a binary response and logit link. We applied  
113 an autoregressive correlation matrix to account for multiple observations per patient.[18,19] The  
114 autoregressive correlation matrix assumes measurements closest in time are most correlated  
115 and that this correlation decreases exponentially as measurements become more distant. To  
116 examine the possible non-linear association between age and each outcome nonparametrically,  
117 we used restricted cubic splines. We fit multiple models with varying numbers of knots for each  
118 outcome and chose the best model by assessing the quasi-likelihood under the Independence  
119 Criterion (QIC), where smaller values indicate better model fit.[20] For the outcomes of CD4  
120 count and viral load suppression, modeling age with seven and four knots, respectively, fit the  
121 data best. For the outcome of nonadherence, modeling age as linear fit the data best. We tested  
122 for a relationship between age and each outcome using the likelihood ratio test. To examine  
123 whether the overall association between age and viral suppression was driven by an increasing  
124 probability of viral suppression at younger ages, versus a declining probability of suppression  
125 during adolescence, we tested for an association between older age (16-18 years) versus  
126 younger age (10-12 years) in the subset of measurements taken from 10 to 18 years of age.  
127 Analyses were conducted in SAS version 9.4 (Cary, NC). This study was reviewed and  
128 approved by research ethics committees at INSN, Lima, Peru and Harvard Medical School,  
129 Boston, USA. Research ethics committees deemed that patient consent was not required for the  
130 retrospective chart review.

131

## 132 **Results**

### 133 **Cohort characteristics**

134 Of 132 adolescents, 128 (97.0%) were on cART for  $\geq 6$  months at the time of chart review and  
135 were included in the analysis. The median age at the time of the chart review was 14.6 years  
136 (25<sup>th</sup> percentile=12.1, 75<sup>th</sup> percentile=16.6) with a median follow-up time after six months of  
137 cART of 7.5 years (25<sup>th</sup> percentile=4.8, 75<sup>th</sup> percentile=10.0). The median age of cART initiation  
138 was 5.7 years (25<sup>th</sup> percentile=3.8, 75<sup>th</sup> percentile=9.4) (Table 1). Because data were restricted  
139 to the period that patients were age five or greater and on cART, the earliest CD4 counts, viral  
140 load measurements, and nonadherence notes were recorded in 2004 (i.e. the year in which the  
141 oldest patients included in the chart review were age five and had access to cART). The latest  
142 CD4 counts, viral load measurements, and nonadherence notes were recorded in 2015 (i.e. the  
143 year of the chart review).

144

### 145 **CD4 count**

146 A total of 2,449 CD4 counts after  $\geq 6$  months of cART were observed in 128 patients. Patients  
147 had a median of 17 CD4 counts (25<sup>th</sup> percentile=11, 75<sup>th</sup> percentile=27) over the follow up  
148 period and the median interval between measurements was 3.0 months (25<sup>th</sup> percentile=3.0  
149 months, 75<sup>th</sup> percentile=4.1 months). We observed a statistically significant non-linear  
150 relationship between age and CD4 count ( $p=0.02$ , Figure 1). The mean CD4 count trended  
151 downward during childhood and decreased at a faster rate after approximately 12.8 years of  
152 age (154 months) from a predicted mean CD4 count of 723 cells/mm<sup>3</sup> (95% CI: 666, 784) to 429  
153 cells/mm<sup>3</sup> (95% CI: 356, 517) at 18 years of age (216 months).

154

## 155 **Viral load suppression**

156 Over the follow up period, patients had a median of 12 viral load measurements after having  
157 been on cART for  $\geq 6$  months (25<sup>th</sup> percentile=9, 75<sup>th</sup> percentile=16.5). The median interval  
158 between assessments was 6.0 months (25<sup>th</sup> percentile=5.8 months, 75<sup>th</sup> percentile=6.7 months).  
159 Of 1,531 viral loads among 128 patients, 1,115 (73%) were suppressed (<400 copies/ml). At  
160 least one suppressed viral load was observed in 123 (96%) patients. We observed a non-linear  
161 relationship between age and viral load suppression ( $p < 0.0001$ ) in which the predicted  
162 proportion of patients with viral suppression increased during childhood and early adolescence  
163 and declined thereafter (Figure 1). The predicted proportion of patients with viral load  
164 suppression peaked at age 12.7 years (152 months), with 84% (95% CI: 79, 88) virally  
165 suppressed. By 18 years of age (216 months), suppression rates decreased to 67% (95% CI:  
166 47, 83). When we examined the association between age and viral load suppression during  
167 adolescence, we found a significantly lower predicted probability ( $p = 0.02$ ) of viral load  
168 suppression in older adolescence (i.e., 16 to 18 years of age) than younger adolescence (i.e.,  
169 10 to 12 years of age).

170

## 171 **Nonadherence**

172 A total of 328 nonadherence notes were recorded over 10,788 follow-up months. Eighty-six  
173 (67%) patients had at least one nonadherence note recorded in their chart. The median number  
174 of nonadherence notes per patient was one (25<sup>th</sup> percentile=0, 75<sup>th</sup> percentile=4). The predicted  
175 proportion with a nonadherence note increased with age in a log-linear fashion ( $p < 0.0001$ ,  
176 Figure 1). At five years of age (60 months), the predicted proportion of patients with a  
177 nonadherence note was 0.8% (95% CI: 0.5, 1.3) which increased to 11% (95% CI: 7, 15) by 18  
178 years of age (216 months).

179



## 180 **Discussion**

181 We report lifetime changes of CD4 count, viral load suppression and nonadherence from  
182 childhood into adolescence in a cohort of adolescent patients on cART at an urban pediatric  
183 hospital in Lima, Peru. We found that dramatic declines in CD4 count and viral load suppression  
184 were observed after approximately age 13 and that nonadherence increased with age. These  
185 findings indicate that targeted interventions to improve clinical outcomes and support cART  
186 adherence are needed early in adolescence in this population.

187 Adherence to cART is critical to maintaining viral load suppression.[21,22] In our study,  
188 decreases in viral load suppression and mean absolute CD4 count with age are likely due to  
189 increases in nonadherence, which changed in tandem with these outcomes. Other work in this  
190 population supports that adherence suffers during adolescence and that the mechanisms  
191 through which nonadherence occur are amenable to intervention. Through a health behaviors  
192 survey implemented in this study population, we found self-reported nonadherence was greatest  
193 in the 13 to 15 year age group, with 82% of adolescents missing  $\geq 3$  doses in a 30 day  
194 period.[23] In psychosocial support groups, adolescents described barriers to adherence at the  
195 individual- and family/caregiver-levels, providing the ideal opportunity to deliver support or  
196 education interventions.[24] Over the last decade, many adherence interventions leveraging  
197 technology have been studied.[25,26] Some of this work has been conducted exclusively in  
198 adolescents[27,28] and may be particularly acceptable in populations with ready access and  
199 experience using mobile devices, like adolescents in Lima.[29] As adolescents mature and  
200 responsibility for their care is transferred from caregiver to the adolescent, health education on  
201 living with HIV becomes increasingly important. Education through non-traditional mediums  
202 such as social media and music have been explored in young persons,[30–32] however further  
203 work from a variety of settings is needed. At 18, most adolescents must transition from pediatric  
204 to adult HIV care, a period associated with poor outcomes.[33] In our study, we observed

205 declines in viral load suppression and adherence even before this transition. In anticipation of  
206 this change, education and skills building on how to stay healthy into adulthood should be  
207 provided early on in adolescence.

208 Adolescents continue to be underrepresented in HIV research and policy, despite calls to  
209 prioritize this group.[34,35] Systematic reviews assessing interventions for ALHIV have found  
210 that most studies are conducted in adults or in high-resource settings.[36–38] When studies  
211 include ALHIV from low-resource settings, they are primarily from Sub Saharan Africa,[38]  
212 limiting the generalizability of findings outside settings with generalized HIV epidemics.[38] A  
213 2015 systematic review of interventions to improve linkage and retention in care among ALHIV  
214 did not identify any studies from Latin America,[27] and only 10% of studies in a review  
215 investigating adherence among adolescents were conducted in Latin America—all of which  
216 were from Brazil.[38] In Peru, adolescents ages 10 to 19 years are largely perinatally infected,  
217 while new cases of HIV in youth ages 15 to 24 years are concentrated in men who have sex  
218 with men and transgender women.[39] These key differences in risk populations demand  
219 tailored interventions.

220 Limitations include that our study population is a survivor cohort. A retrospective chart review of  
221 all children <18 years receiving HIV care at INSN from 2003 to 2012 reported mortality rates  
222 were under 9%, indicating survivor bias in our study is likely small.[40] Additionally, data on  
223 nonadherence was based on the presence of a clinician note documented in the chart. In  
224 modeling these data, we assumed that the absence of a nonadherence note signified  
225 adherence, thus our estimate of the predicted proportion of patients with a nonadherence note  
226 may be of greater magnitude. Despite these limitations, the nonadherence results triangulate  
227 with those of CD4 count and viral load, as would be expected. Together, these findings provide  
228 evidence that adolescence is an important period for interventions aimed at improving clinical  
229 outcomes, of which adherence support is one strategy.

230

231 **Conclusions**

232 Studies assessing lifetime HIV outcomes from childhood to adolescence are limited, especially  
233 in Latin America. Decreases in mean CD4 count and viral load suppression were observed  
234 during early adolescence and occurred in accordance with provider-reported nonadherence.  
235 Research on effective, tailored interventions aimed at improving clinical outcomes and  
236 adherence during adolescence are needed in this population.

237

238 **Competing interests**

239 The authors report no conflicts of interest.

240

241 **Authors' contributions**

242 LK, MFF and MM conceived of the study. MFF designed the study. AR and MW collected the

243 data and MM supervised data collection. CAR conducted the analysis and wrote the first draft.

244 AR, CAR, KP, LK, MFF and MW interpreted the results. All authors critically reviewed the

245 manuscript and approved the manuscript for submission.

246

247 **Acknowledgements**

248 This study was support by funding from the William F. Milton Fund of Harvard University.

249

250

251 **References**

- 252 1. UNICEF. Turning the tide against AIDS will require more concentrated focus on  
253 adolescents and young people. 2018. Accessible at:  
254 <https://data.unicef.org/topic/hivaids/adolescents-young-people/>. Accessed September 17,  
255 2018.
- 256 2. Boerma RS, Boender TS, Bussink AP, Calis JCJ, Bertagnolio S, Rinke de Wit TF, et al.  
257 Suboptimal Viral Suppression Rates Among HIV-Infected Children in Low- and Middle-  
258 Income Countries: A Meta-analysis. *Clin Infect Dis*. 2016;63(12):1645–54.
- 259 3. Wringe A, Floyd S, Kazooba P, Mushati P, Baisley K, Urassa M, et al. Antiretroviral  
260 therapy uptake and coverage in four HIV community cohort studies in sub-Saharan  
261 Africa. *Trop Med Int Health*. 2012;17(8):e38-48.
- 262 4. Children and AIDS Fifth stocktaking report. New York, United Nations Children's Fund,  
263 2010. Accessible at:  
264 [http://www.unicef.org/publications/files/Children\\_and\\_AIDSFifth\\_Stocktaking\\_](http://www.unicef.org/publications/files/Children_and_AIDSFifth_Stocktaking_Report_2010_EN.pdf)  
265 [Report\\_2010\\_EN.pdf](http://www.unicef.org/publications/files/Children_and_AIDSFifth_Stocktaking_Report_2010_EN.pdf). Accessed September 17, 2018.
- 266 5. Williams PL, Storm D, Montepiedra G, Nichols S, Kammerer B, Sirois PA, et al.  
267 Predictors of adherence to antiretroviral medications in children and adolescents with HIV  
268 infection. *Pediatrics* 2006; 118:e1745-57.
- 269 6. Khan M, Song X, Williams K, Bright K, Sill A, Rakhmanina N. Evaluating adherence to  
270 medication in children and adolescents with HIV. *Arch Dis Child* 2009; 94:970 LP-973.
- 271 7. UNAIDS/UNICEF. All in to end the adolescents AIDS epidemic. 2016. Accessible at:  
272 [http://www.unaids.org/sites/default/files/media\\_asset/ALLIN2016ProgressReport\\_en.pdf](http://www.unaids.org/sites/default/files/media_asset/ALLIN2016ProgressReport_en.pdf).  
273 Accessed September 17, 2018.
- 274 8. Dollfus C, Le Chenadec J, Faye A, Blanche S, Briand N, Rouzioux C, et al. Long-term  
275 outcomes in adolescents perinatally infected with HIV-1 and followed up since birth in the  
276 French perinatal cohort (EPF/ANRS CO10). *Clin Infect Dis*. 2010;51(2):214–24.

- 277 9. Neilan AM, Karalius B, Patel K, Van Dyke RB, Abzug MJ, Agwu AL, et al. Association of  
278 Risk of Viremia, Immunosuppression, Serious Clinical Events, and Mortality With  
279 Increasing Age in Perinatally Human Immunodeficiency Virus-Infected Youth. *JAMA*  
280 *Pediatr.* 2017;171(5):450–60.
- 281 10. Smith TT, Hsu AJ, Hutton N, Womble F, Agwu AL. Long-term Virologic Suppression  
282 Despite Presence of Resistance-associated Mutations Among Perinatally HIV-infected  
283 Youth. *Pediatr Infect Dis J.* 2015;34(12):1365–8.
- 284 11. Patel K, Hernan MA, Williams PL, Seeger JD, McIntosh K, Van Dyke RB, et al. Long-term  
285 effectiveness of highly active antiretroviral therapy on the survival of children and  
286 adolescents with HIV infection: a 10-year follow-up study. *Clin Infect Dis.*  
287 2008;46(4):507–15.
- 288 12. Souza E, Santos N, Valentini S, Silva G, Falbo A. Long-term follow-up outcomes of  
289 perinatally HIV-infected adolescents: infection control but school failure. *J Trop Pediatr.*  
290 2010;56(6):421–6.
- 291 13. Candiani TMS, Pinto J, Cardoso CAA, Carvalho IR, Dias ACM, Carneiro M, et al. Impact  
292 of highly active antiretroviral therapy (HAART) on the incidence of opportunistic  
293 infections, hospitalizations and mortality among children and adolescents living with  
294 HIV/AIDS in Belo Horizonte, Minas Gerais State, Brazil. *Cad Saude Publica.* 2007;23  
295 Suppl 3:S414-23.
- 296 14. Ministerio de Salud. A Step Forward in the Fight Against AIDS In Lima: Ministerio de  
297 Salud del Peru (MINSa): The first two years of universal access to antiretroviral treatment  
298 in Peru. Lima, Peru, 2006.
- 299 15. Ministerio de Salud. Resolución Ministerial N° 731-2003-SA/DM, que aprueba la Directiva  
300 N° 020-MINSA-DGSP-V.01: Sistema de Atención para el Tratamiento Antirretroviral en  
301 los Niños Infeccionados por el Virus de Inmunodeficiencia Humana. Lima, Peru, 2003.

- 302 16. Ministerio de Salud. Resolución Ministerial N° 567-2013/MINSA, que aprueba la NTS N°  
303 102- MINSA/DGSP. V01: Norma Técnica de Salud para la Atención Integral y  
304 Tratamiento Antirretroviral de los Niños, Niñas y Adolescentes Infectados por el Virus de  
305 la Inmu.
- 306 17. Panel on Antiretroviral Therapy and Medical Management of HIV-Infected Children.  
307 Guidelines for the Use of Antiretroviral Agents in Pediatric HIV Infection. Available at  
308 <http://aidsinfo.nih.gov/contentfiles/lvguidelines/pediatricguidelines.pdf>. Accessed  
309 September 17, 2018.
- 310 18. Durrleman S, Simon R. Flexible regression models with cubic splines. *Stat Med*.  
311 1989;8(5):551–61.
- 312 19. Li R, Hertzmark E, Spiegelman D. The SAS GLMCMRV9 Macro. Boston, MA: Channing  
313 Laboratory; 2008.
- 314 20. Pan W. Akaike's information criterion in generalized estimating equations. *Biometrics*.  
315 2001;57(1):120–5.
- 316 21. Bangsberg DR. Less than 95% adherence to nonnucleoside reverse-transcriptase  
317 inhibitor therapy can lead to viral suppression. *Clin Infect Dis*. 2006;43(7):939–41.
- 318 22. Paterson DL, Swindells S, Mohr J, Brester M, Vergis EN, Squier C, et al. Adherence to  
319 protease inhibitor therapy and outcomes in patients with HIV infection. *Ann Intern Med*.  
320 2000;133(1):21–30.
- 321 23. Valle E, Rodriguez C, Galea JT, Wong M, Kolevic L, Munoz M, et al. Understanding  
322 health-related behaviors among adolescents living with HIV in urban Peru; *under review*.
- 323 24. Galea JT, Wong M, Muñoz M, Valle E, Leon SR, Díaz Perez D, et al. Barriers and  
324 facilitators to antiretroviral therapy adherence among Peruvian adolescents living with  
325 HIV: A qualitative study. *PLoS One*. 2018;13(2):e0192791.
- 326 25. Quintana Y, Gonzalez Martorell EA, Fahy D, Safran C. A Systematic Review on  
327 Promoting Adherence to Antiretroviral Therapy in HIV-infected Patients Using Mobile

- 328 Phone Technology. *Appl Clin Inform*. 2018;9(2):450–66.
- 329 26. Garrison LE, Haberer JE. Technological methods to measure adherence to antiretroviral  
330 therapy and preexposure prophylaxis. *Curr Opin HIV AIDS*. 2017;12(5):467–74.
- 331 27. MacPherson P, Munthali C, Ferguson J, Armstrong A, Kranzer K, Ferrand RA, et al.  
332 Service delivery interventions to improve adolescents' linkage, retention and adherence  
333 to antiretroviral therapy and HIV care. *Trop Med Int Health*. 2015;20(8):1015–32.
- 334 28. Ridgeway K, Dulli LS, Murray KR, Silverstein H, Dal Santo L, Olsen P, et al. Interventions  
335 to improve antiretroviral therapy adherence among adolescents in low- and middle-  
336 income countries: A systematic review of the literature. *PLoS One*. 2018;13(1):e0189770.
- 337 29. IPSOS. Hábitos, usos y actitudes hacia el internet 2017. Accessible at:  
338 <https://www.ipsos.com/es-pe/habitos-usos-y-actitudes-hacia-el-internet-2017>. Accessed  
339 September 17, 2018.
- 340 30. Taggart T, Grewe ME, Conserve DF, Gliwa C, Roman Isler M. Social Media and HIV: A  
341 Systematic Review of Uses of Social Media in HIV Communication. *J Med Internet Res*  
342 2015;17(11):e248.
- 343 31. Cao B, Gupta S, Wang J, Hightow-Weidman LB, Muessig KE, Tang W, et al. Social  
344 Media Interventions to Promote HIV Testing, Linkage, Adherence, and Retention:  
345 Systematic Review and Meta-Analysis. *J Med Internet Res*. 2017;19(11):e394.
- 346 32. Calderon Y, Cowan E, Nickerson J, Mathew S, Fettig J, Rosenberg M, et al. Educational  
347 Effectiveness of an HIV Pretest Video for Adolescents: A Randomized Controlled Trial.  
348 *Pediatrics*. 2011;127(5):911–6.
- 349 33. Bailey H, Cruz MLS, Songtaweasin WN, Puthanakit T. Adolescents with HIV and  
350 transition to adult care in the Caribbean, Central America and South America, Eastern  
351 Europe and Asia and Pacific regions. *J Int AIDS Soc*. 2017;20(0):21475.
- 352 34. Armstrong A, Nagata JM, Vicari M, Irvine C, Cluver L, Sohn AH, et al. A Global Research  
353 Agenda for Adolescents Living With HIV. *J Acquir Immune Defic Syndr*. 2018;78 Suppl



- 354 1:S16–21.
- 355 35. CIPHER. A global research agenda for adolescents living with HIV. 2017. Accessible at:  
356 [https://www.iasociety.org/Web/WebContent/File/CIPHER\\_policy\\_brief\\_ado\\_EN.pdf](https://www.iasociety.org/Web/WebContent/File/CIPHER_policy_brief_ado_EN.pdf).  
357 Accessed September 17, 2018.
- 358 36. Kanters S, Park JJH, Chan K, Socias ME, Ford N, Forrest JI, et al. Interventions to  
359 improve adherence to antiretroviral therapy: a systematic review and network meta-  
360 analysis. *Lancet HIV*. 2017;4(1):e31–40.
- 361 37. Govindasamy D, Meghij J, Negussi EK, Baggaley RC, Ford N, Kranzer K. Interventions to  
362 improve or facilitate linkage to or retention in pre-ART (HIV) care and initiation of ART in  
363 low- and middle-income settings – a systematic review. *J Int AIDS Soc*.  
364 2014;17(1):19032.
- 365 38. Kim S-H, Gerver SM, Fidler S, Ward H. Adherence to antiretroviral therapy in adolescents  
366 living with HIV: systematic review and meta-analysis. *AIDS*. 2014;28(13).
- 367 39. Ministerio de Salud del Perú. Informe nacional sobre los progresos realizados en el país.  
368 Lima, Peru: 2014. Accessible at:  
369 [http://files.unaids.org/en/dataanalysis/knowyourresponse/countryprogressreports/2014co](http://files.unaids.org/en/dataanalysis/knowyourresponse/countryprogressreports/2014countries/PER_narrative_report_2014.pdf)  
370 [untries/PER\\_narrative\\_report\\_2014.pdf](http://files.unaids.org/en/dataanalysis/knowyourresponse/countryprogressreports/2014countries/PER_narrative_report_2014.pdf). Accessed September 17, 2018
- 371 40. Baker AN, Bayer AM, Viani RM, Kolevic L, Sim M-S, Deville JG. Morbidity and Mortality  
372 of a Cohort of Peruvian HIV-Infected Children 2003-2012. *Pediatr Infect Dis J*.  
373 2018;37(6):564-9.

**Table 1. Clinical characteristics among adolescents living with HIV in urban Peru, (N=128)**

|                                                                                 | <b>Median (25<sup>th</sup>, 75<sup>th</sup> percentiles)<sup>a</sup></b> |
|---------------------------------------------------------------------------------|--------------------------------------------------------------------------|
| Male, N (%)                                                                     | 68 (53.1)                                                                |
| Age at chart review (years)                                                     | 14.6 (12.1, 16.6)                                                        |
| Age at cART initiation (years)                                                  | 5.7 (3.8, 9.4)                                                           |
| Follow-up time on $\geq 6$ months of cART (years)                               | 7.5 (4.8, 10.0)                                                          |
| Time on cART (years)                                                            | 8.2 (5.4, 10.7)                                                          |
| Viral loads measurements                                                        |                                                                          |
| Number of viral loads measurements per adolescent after $\geq 6$ months of cART | 12 (9, 16.5)                                                             |
| Interval between viral load measurements (days)                                 | 182 (175, 203)                                                           |
| CD4 count measurements                                                          |                                                                          |
| Number of CD4 count measurements per adolescent after $\geq 6$ months of cART   | 17 (11, 27)                                                              |
| Interval between CD4 counts measurements (days)                                 | 91 (91, 126)                                                             |
| Nonadherence                                                                    |                                                                          |
| Adolescents with a nonadherence note, N (%)                                     | 86 (67.2)                                                                |
| Number of nonadherence notes per adolescent                                     | 1 (0, 4)                                                                 |

<sup>a</sup> Unless specified otherwise

**Figure 1. Lifetime changes in CD4 count (A), viral load suppression (B), and nonadherence (C) from age 5 (60 months) to 18 years (216 months) among adolescents living with HIV on cART in Lima, Peru**

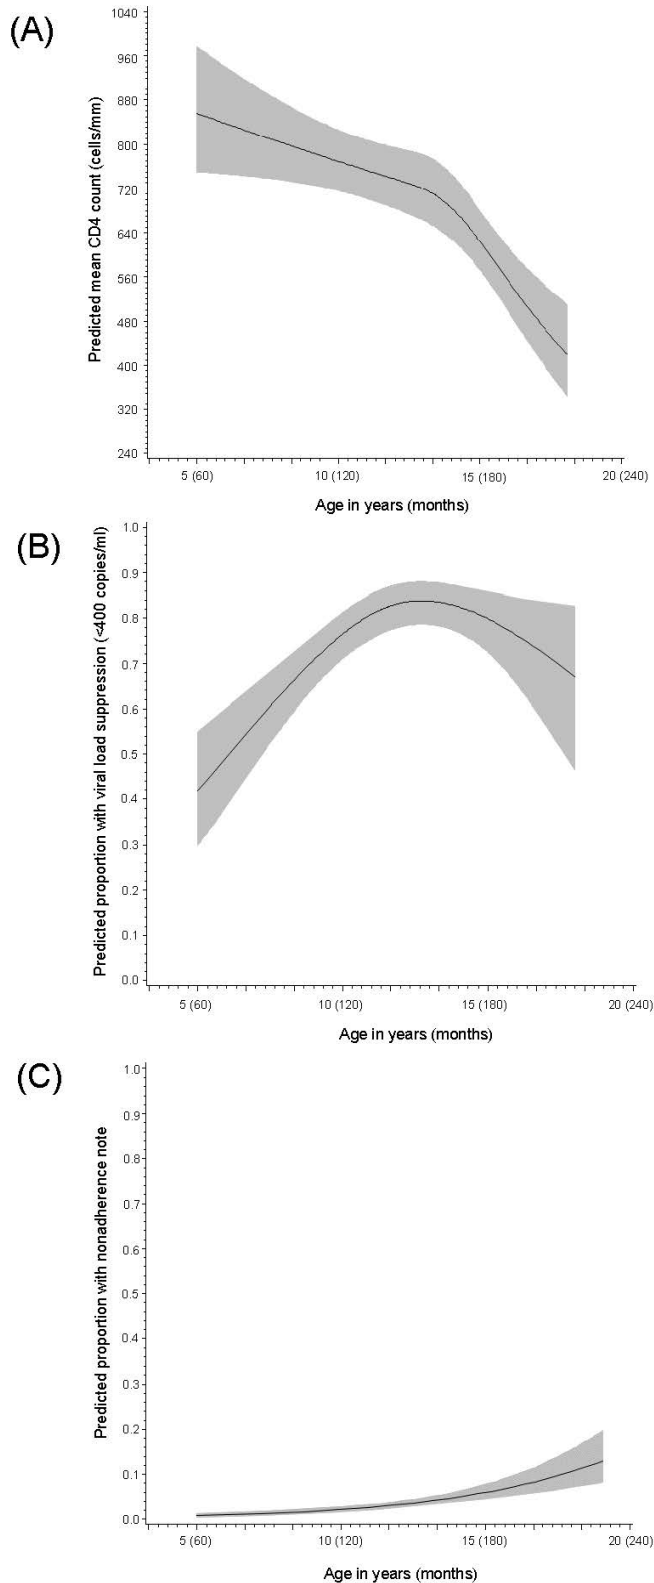

## FIGURE CAPTIONS

Figure 1. (A) Mean CD4 count (cell/mm<sup>3</sup>), by age in years and months; (B) Proportion of adolescents with viral load suppression (<400 copies/ml), by age in years and months; (C) Proportion of adolescents with a nonadherence note, by age in years and months
